# Supplementary material
Source: PubMed Central journal article supplement (PMC1859910)

WT

Lori-IKK $\alpha$ **A**

DMBA/TPA

DMBA

DMBA/TPA

DMBA

Papilloma  
x100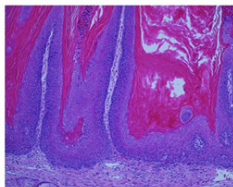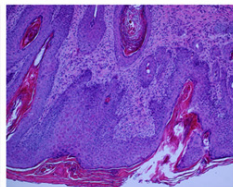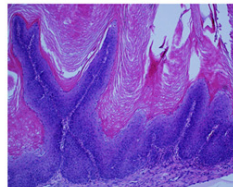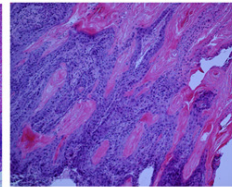Carcinoma  
x100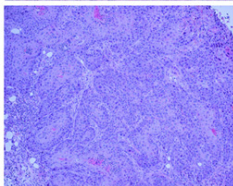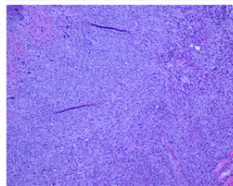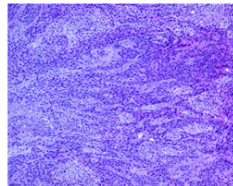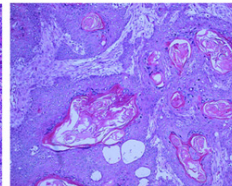Carcinoma  
x400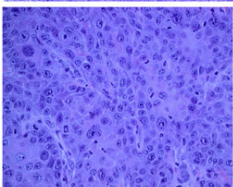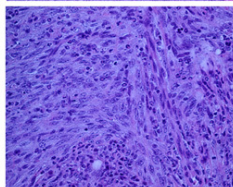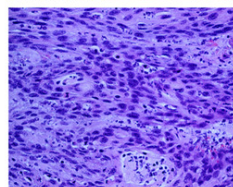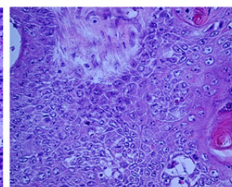

Carcinomas in Lung of WT Mice

**B**

1

2

3

4

H&E  
x100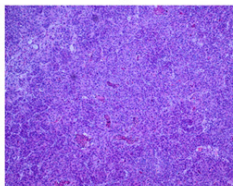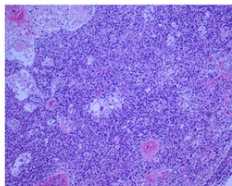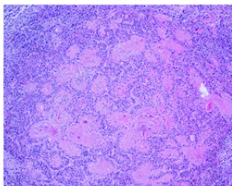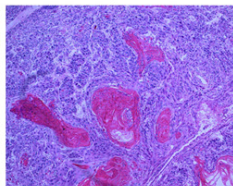H&E  
x400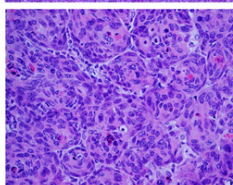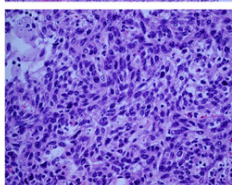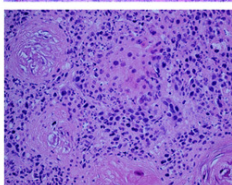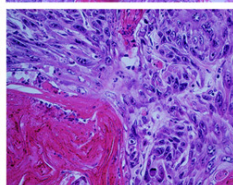K5  
x400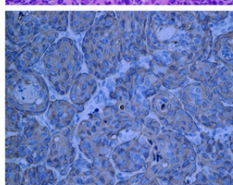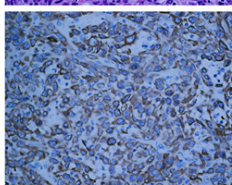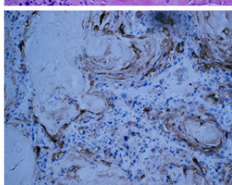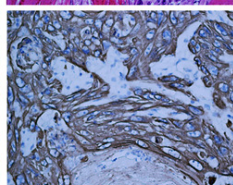

Supplement: pnas_0604481103_3.pdf [file pnas_0604481103_3.pdf]
