# Supplementary material
Source: PubMed Central journal article supplement (PMC1859910)

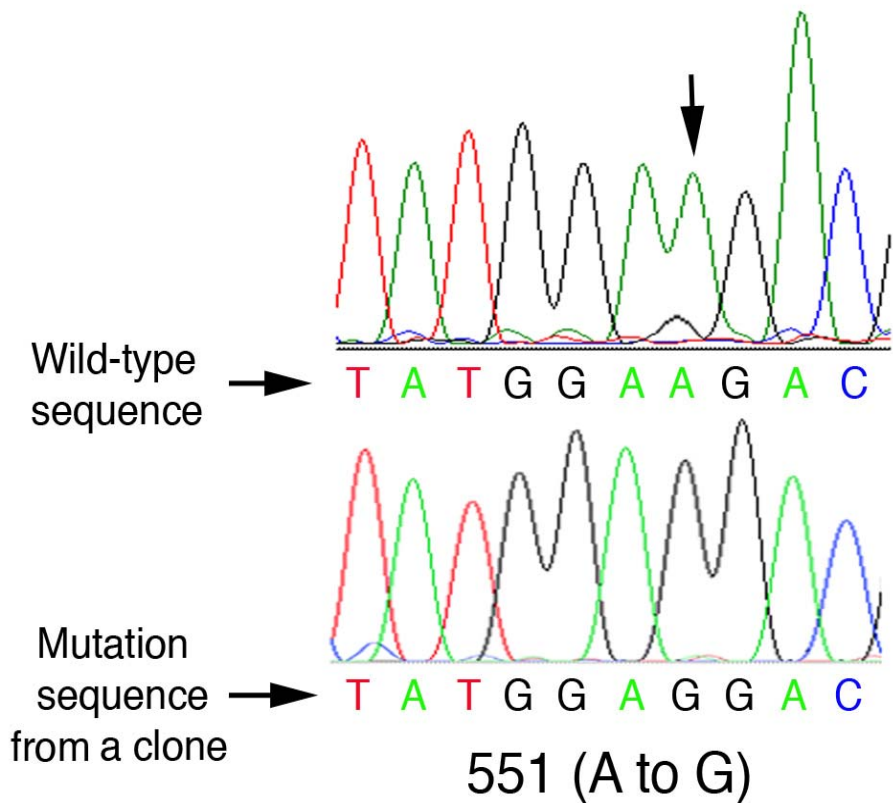

Supplement: pnas_0604481103_1.pdf [file pnas_0604481103_1.pdf]

HA

HA+DAPI

Tg

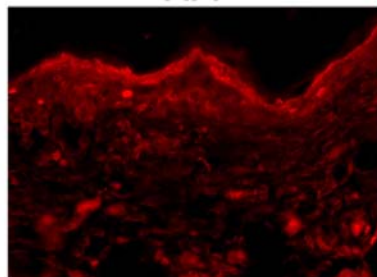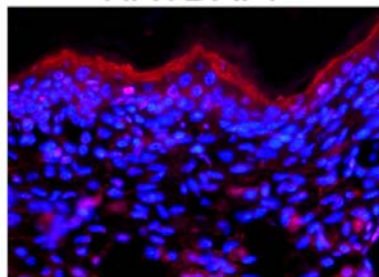

WT

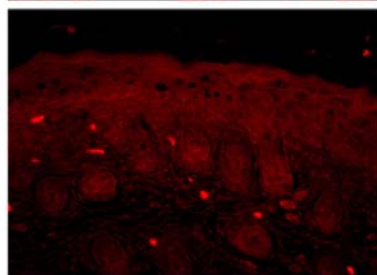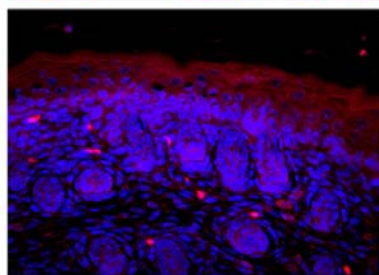IKK $\alpha$ IKK $\alpha$ +DAPI

WT

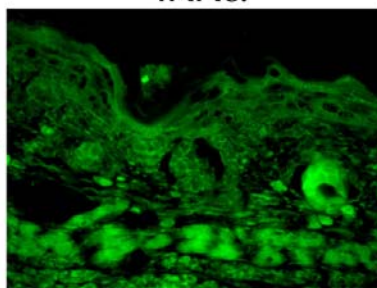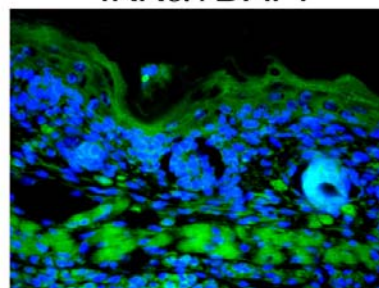

-/-

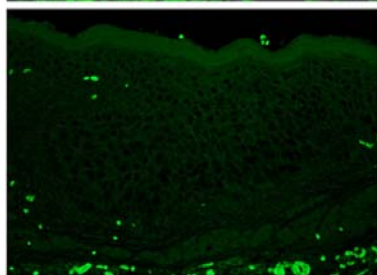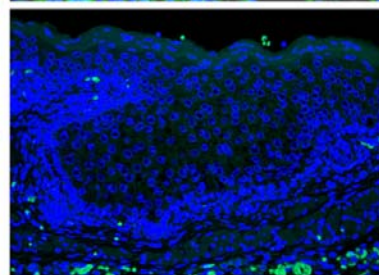

Supplement: pnas_0604481103_2.pdf [file pnas_0604481103_2.pdf]

**C****Carcinoma****Carcinoma****H&E**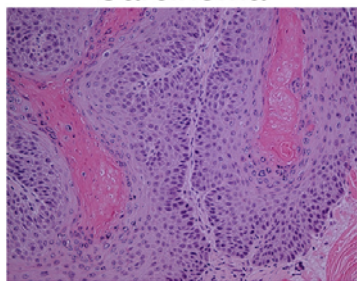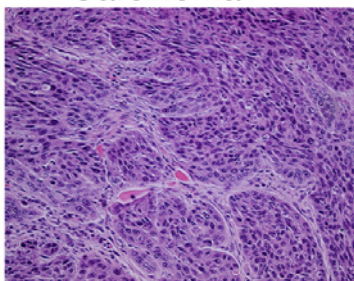**K5**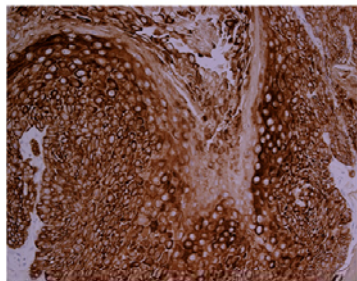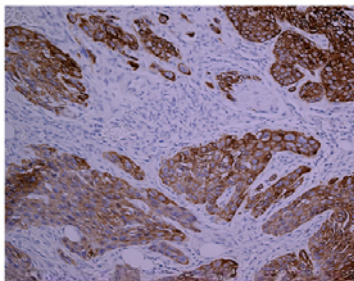**K10**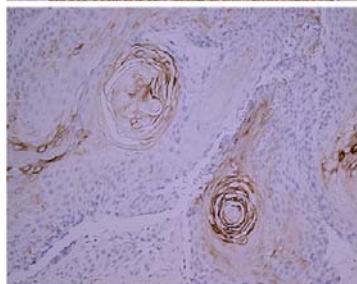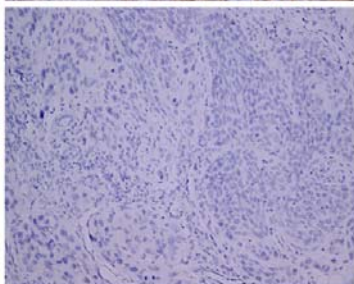**Cont**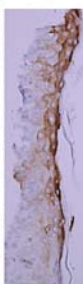**Filag**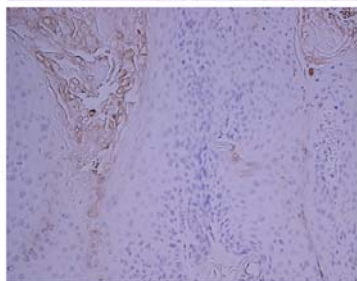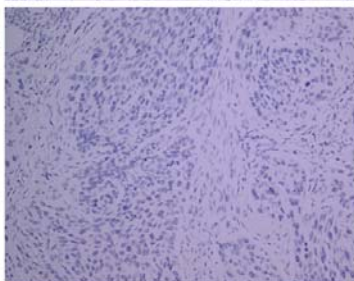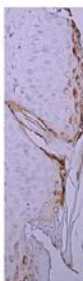

Supplement: pnas_0604481103_4.pdf [file pnas_0604481103_4.pdf]

VEGF-A

VEGF-A/DAPI

WT

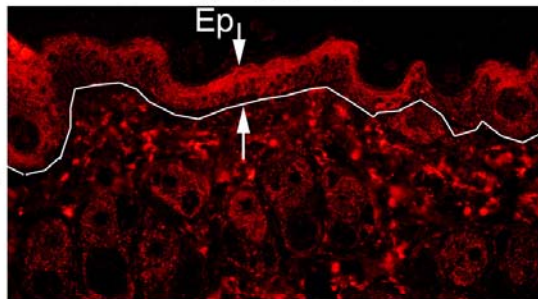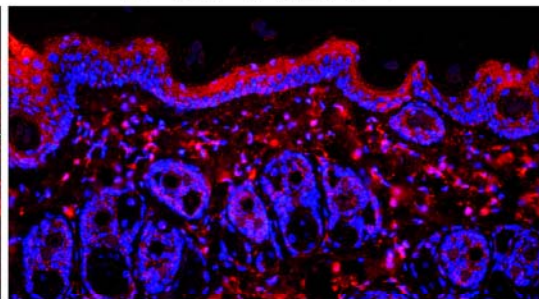

Tg

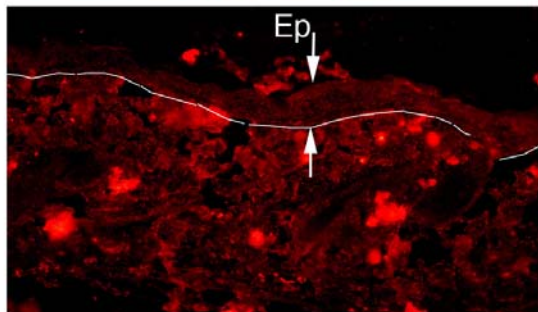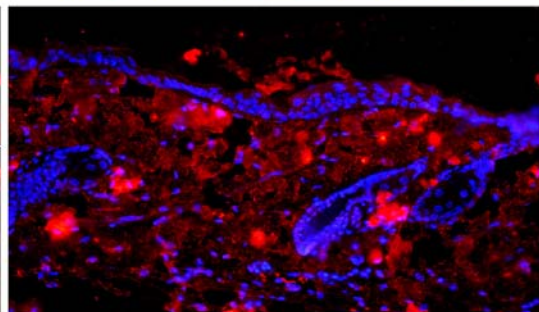

Supplement: pnas_0604481103_5.pdf [file pnas_0604481103_5.pdf]
